# Supplementary material for: Comparative Analysis of Posiphen Pharmacokinetics across Different Species—Similar Absorption and Metabolism in Mouse, Rat, Dog and Human
Source: MDPI journal article supplement (doi:10.3390/biom14050582), 2024-05-15
Supplement: s1 [file s1]

## Supplementary Material S2

|         | CD-1 Mice, n=7            |      |      | Sprague Dawley Rats, n=6 |     |      | Beagle Dogs, n=12        |       |      |
|---------|---------------------------|------|------|--------------------------|-----|------|--------------------------|-------|------|
|         | Posiphen 65 mg/kg, plasma |      |      | Posiphen 40mg/kg, plasma |     |      | Posiphen 20mg/kg, plasma |       |      |
| Time, h | Mean                      | SD   | %CV  | Mean                     | SD  | %CV  | Mean                     | SD    | %CV  |
| 0.25    | 937                       | 229  | 24.4 | 1090                     | 724 | 66.7 | 2.34                     | 7.95  | 339  |
| 0.5     | 939                       | 445  | 445  | 1180                     | 684 | 58.2 | 241                      | 333   | 138  |
| 1       | 610                       | 167  | 167  | 771                      | 627 | 81.3 | 326                      | 236   | 72.4 |
| 2       | 571                       | 283  | 283  | 381                      | 523 | 137  | 203                      | 149   | 73.2 |
| 4       | 19.5                      | 16.5 | 16.5 | 243                      | 276 | 113  | 32.3                     | 13.7  | 42.5 |
| 8       | ND                        | ND   | ND   | 234                      | 188 | 80.3 | 4.4                      | 2.23  | 50.7 |
| 12      | ND                        | ND   | ND   | ND                       | ND  | ND   | 1.27                     | 0.678 | 53.5 |

**Supplementary Table S1.** Mean maximum concentration (C<sub>max</sub>), standard deviation (SD) and % of coefficient of variance (%CV) of Posiphen in mice, rats and dogs over a 12-hour period.

|         | CD-1 Mice, n=7         |      |      |                        |      |      |
|---------|------------------------|------|------|------------------------|------|------|
|         | N1-norposiphen, plasma |      |      | N8-norposiphen, plasma |      |      |
| Time, h | Mean                   | SD   | %CV  | Mean                   | SD   | %CV  |
| 0.25    | 350                    | 20.6 | 5.88 | 882                    | 200  | 22.7 |
| 0.5     | 484                    | 87.1 | 18.0 | 1309                   | 81.6 | 6.24 |
| 1       | 446                    | 140  | 31.3 | 1562                   | 558  | 35.7 |
| 1.25    | 554                    | 275  | 49.7 | 1793                   | 868  | 48.4 |
| 1.5     | 525                    | 279  | 53.0 | 1931                   | 909  | 47.1 |
| 2       | 419                    | 195  | 46.6 | 1826                   | 869  | 47.6 |
| 4       | 83.6                   | 28.3 | 33.8 | 478                    | 189  | 39.5 |
| 8       | 3.64                   | ND   | ND   | 11.3                   | 9.66 | 85.2 |
| 12      | 0                      | ND   | ND   | 0                      | ND   | ND   |

**Supplementary Table S2.** Mean maximum concentration (C<sub>max</sub>), standard deviation (SD) and % of coefficient of variance (%CV) of N1- and N8-norposiphen in mice over a 12-hour period.
